# Supplementary material for: Synthesis and characterization of graphene oxide–polyimide nanofiber composites
Source: Royal Society of Chemistry journal article supplement (doi:10.1039/c3ra46004e), 2013-12-11
Supplement: c3ra46004e.pdf [file c3ra46004e.pdf]

## Synthesis and Characterization of Graphene Oxide-Polyimide Nanofiber Composites

S. Ramakrishnan<sup>a</sup>, M. Dhakshnamoorthy<sup>b</sup>, E. J. Jelmy<sup>a</sup>, R. Vasanthakumari<sup>b</sup>, Nikhil K. Kothurkar<sup>a\*</sup>

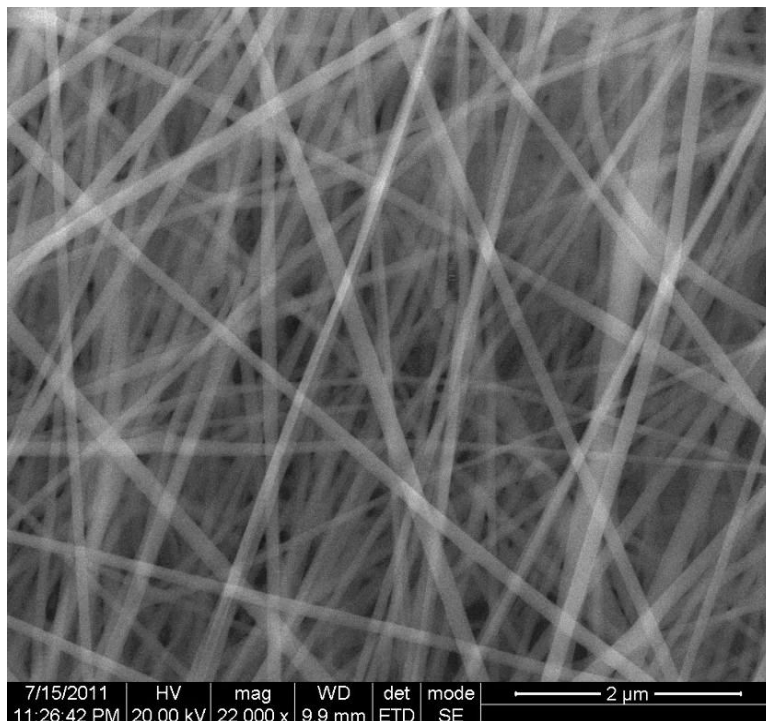

Figure S1 Scanning electron micrographs of PI (neat)

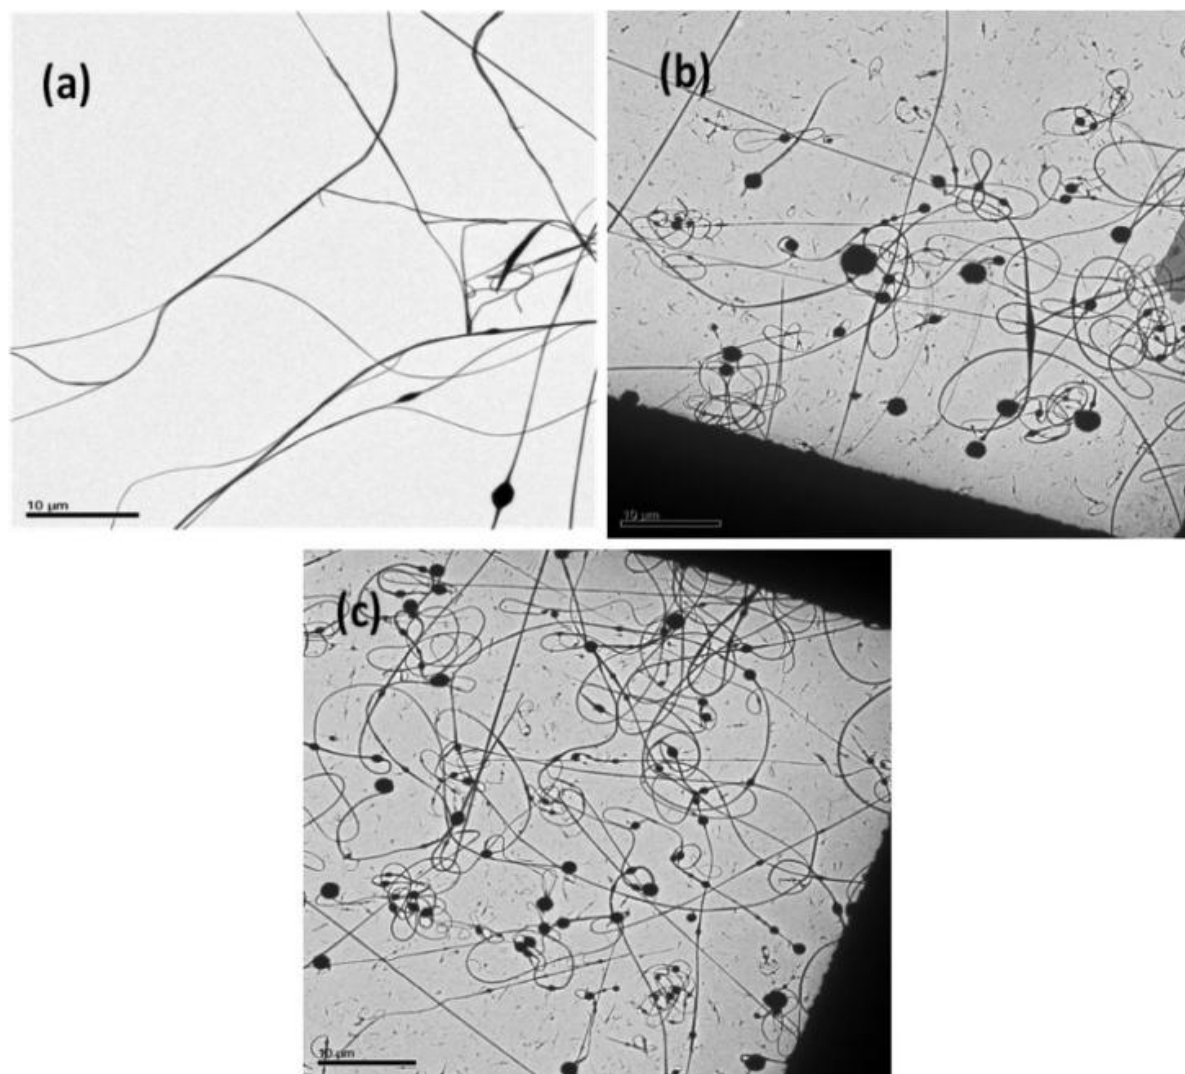

Figure S2 Transmission electron micrographs of GO-PAA with GO contents of 0.1 % (GO) (a), 1% (GO) (b), 2% (GO) (c).

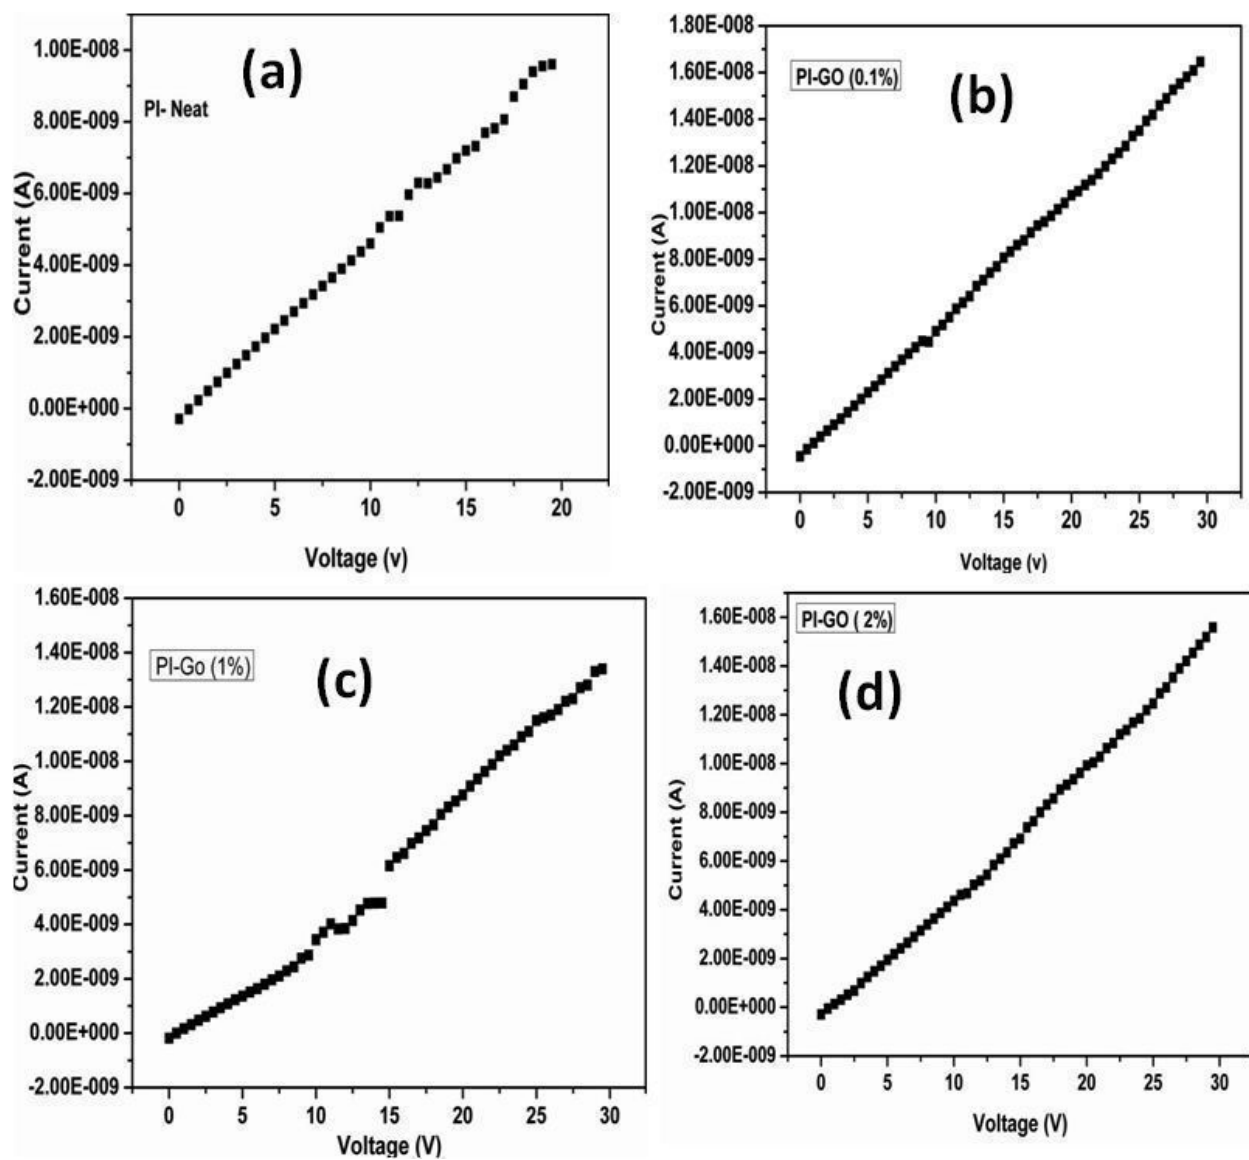

Figure S3 I-V curve of GO-PI with GO contents of 0% (a), 0.1(b), 1(c) and 2%(d)
